# Supplementary material for: DNA-Encoded Chromatin Structural Intron Boundary Signals Identify Conserved Genes with Common Function
Source: Hindawi journal article supplement (doi:10.1155/2015/167578), 2015-01-01

## Exon Sizes

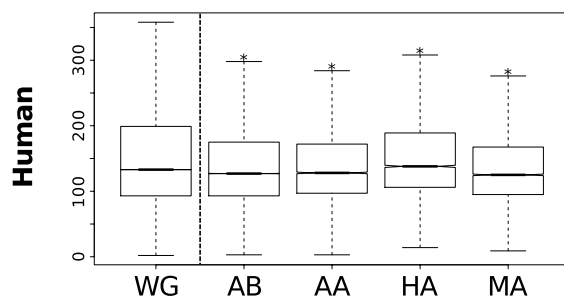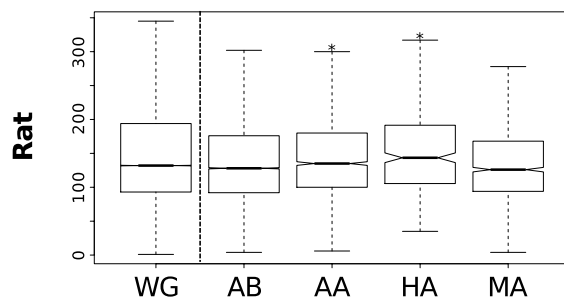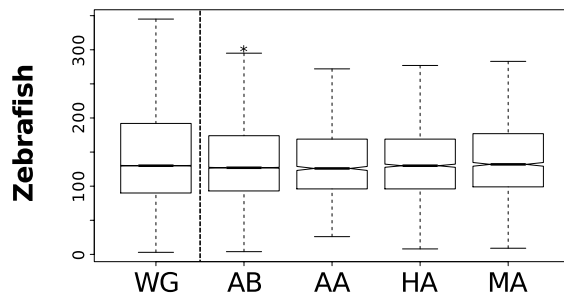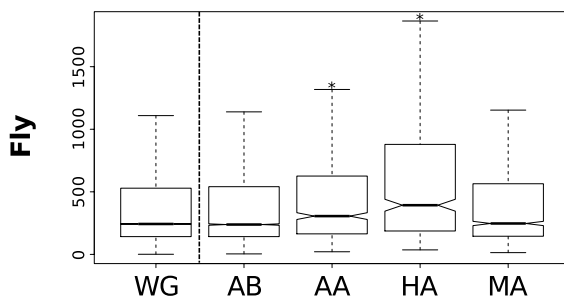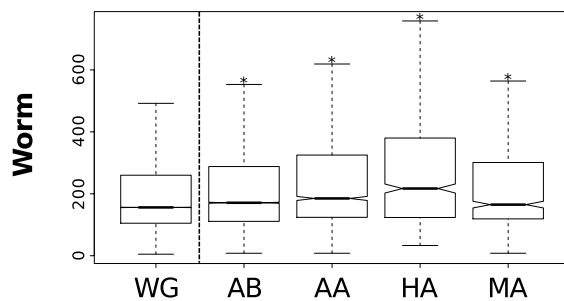

Supplement: f1 [file 167578.f1.pdf]
